# Supplementary material
Source: HighWire-hosted journal article supplement (https://oem.bmj.com/content/76/4/222)

**Supplementary Table 1: Sensitivity analyses for the association between occupational exposures and incidence of CB, chronic cough and chronic phlegm.**  
**N=8794 participants followed-up at ECRHS II and III (n=13185 observations)**

(a) Sensitivity analysis 1: no adjustment for degree of airway obstruction

|                                 | Chronic Bronchitis  |                    |                                     | Chronic cough only  |                    |                                     | Chronic phlegm only |                    |                                     |
|---------------------------------|---------------------|--------------------|-------------------------------------|---------------------|--------------------|-------------------------------------|---------------------|--------------------|-------------------------------------|
|                                 | Unexposed           | Exposed            | RR (95%CI)                          | Unexposed           | Exposed            | RR (95%CI)                          | Unexposed           | Exposed            | RR (95%CI)                          |
| Biological dust                 | 159/9496<br>(1.7%)  | 68/3689<br>(1.8%)  | 1.03<br>(0.78 – 1.36)               | 480/9496<br>(5.1%)  | 188/3689<br>(5.1%) | 0.95<br>(0.81 – 1.12)               | 385/9496<br>(4.1%)  | 179/3689<br>(4.9%) | 1.15<br>(0.97 – 1.37)               |
| Mineral Dust                    | 164/10359<br>(1.6%) | 63/2826<br>(2.2%)  | <b>1.36</b><br><b>(1.01 – 1.85)</b> | 504/10359<br>(4.9%) | 164/2826<br>(5.8%) | 1.12<br>(0.93 – 1.34)               | 374/10359<br>(3.6%) | 190/2826<br>(6.7%) | <b>1.72</b><br><b>(1.44 – 2.06)</b> |
| Gases & fumes                   | 131/8164<br>(1.6%)  | 96/5021<br>(1.9%)  | 1.16<br>(0.89 – 1.50)               | 409/8164<br>(5.0%)  | 259/5021<br>(5.2%) | 0.98<br>(0.84 – 1.14)               | 299/8164<br>(3.7%)  | 265/5021<br>(5.3%) | <b>1.35</b><br><b>(1.15 – 1.58)</b> |
| Vapors, Gases,<br>Dusts & Fumes | 123/7525<br>(1.6%)  | 104/5660<br>(1.8%) | 1.10<br>(0.85 – 1.43)               | 379/7525<br>(5.0%)  | 289/5660<br>(5.1%) | 0.98<br>(0.84 – 1.14)               | 270/7525<br>(3.6%)  | 294/5660<br>(5.2%) | <b>1.37</b><br><b>(1.17 – 1.61)</b> |
| Herbicides                      | 223/12974<br>(1.7%) | 4/211<br>(1.9%)    | 1.11<br>(0.41 – 3.02)               | 655/12974<br>(5.0%) | 13/211<br>(6.2%)   | 1.21<br>(0.71 – 2.07)               | 551/12974<br>(4.2%) | 13/211<br>(6.2%)   | 1.34<br>(0.78 – 2.29)               |
| Insecticides                    | 222/12852<br>(1.7%) | 5/333<br>(1.5%)    | 0.84<br>(0.35 – 2.03)               | 650/12852<br>(5.1%) | 18/333<br>(5.4%)   | 1.04<br>(0.66 – 1.64)               | 546/12852<br>(4.2%) | 18/333<br>(5.4%)   | 1.15<br>(0.73 – 1.83)               |
| Fungicides                      | 222/12823<br>(1.7%) | 5/362<br>(1.4%)    | 0.78<br>(0.32 – 1.92)               | 649/12823<br>(5.1%) | 19/362<br>(5.2%)   | 1.02<br>(0.65 – 1.60)               | 544/12823<br>(4.2%) | 20/362<br>(5.5%)   | 1.19<br>(0.77 – 1.85)               |
| All pesticides                  | 220/12716<br>(1.7%) | 7/469<br>(1.5%)    | 0.87<br>(0.41 – 1.84)               | 644/12716<br>(5.1%) | 24/469<br>(5.1%)   | 1.00<br>(0.67 – 1.50)               | 541/12716<br>(4.3%) | 23/469<br>(4.9%)   | 1.05<br>(0.70 – 1.59)               |
| Aromatic<br>solvents            | 195/11419<br>(1.7%) | 32/1766<br>(1.8%)  | 1.09<br>(0.75 – 1.60)               | 571/11419<br>(5.0%) | 97/1766<br>(5.5%)  | 1.11<br>(0.90 – 1.38)               | 467/11419<br>(4.1%) | 97/1766<br>(5.5%)  | <b>1.27</b><br><b>(1.02 – 1.57)</b> |
| Chlorinated<br>solvents         | 198/11769<br>(1.7%) | 29/1416<br>(2.0%)  | 1.25<br>(0.85 – 1.85)               | 586/11769<br>(5.0%) | 82/1416<br>(5.8%)  | 1.17<br>(0.93 – 1.47)               | 482/11769<br>(4.1%) | 82/1416<br>(5.8%)  | <b>1.32</b><br><b>(1.05 – 1.67)</b> |
| Other solvents                  | 175/9976<br>(1.8%)  | 52/3209<br>(1.6%)  | 0.95<br>(0.70 – 1.29)               | 518/9976<br>(5.2%)  | 150/3209<br>(4.7%) | 0.92<br>(0.77 – 1.10)               | 418/9976<br>(4.2%)  | 146/3209<br>(4.5%) | 1.09<br>(0.91 – 1.31)               |
| Metals                          | 194/11878<br>(1.6%) | 33/1307<br>(2.5%)  | <b>1.71</b><br><b>(1.16 – 2.51)</b> | 588/11878<br>(5.0%) | 80/1307<br>(6.1%)  | <b>1.29</b><br><b>(1.02 – 1.64)</b> | 483/11878<br>(4.1%) | 81/1307<br>(6.2%)  | <b>1.44</b><br><b>(1.14 – 1.82)</b> |

Pooled results from analysis on 50 multiply imputed datasets. Adjusted for age, sex, lifetime smoking pack-years, current smoking, socioeconomic status (SES), current asthma and severity of airflow limitation.

(b) Sensitivity analysis 2: incident asthma cases excluded

|                                 | Chronic Bronchitis  |                   |                                     | Chronic cough only  |                    |                                     | Chronic phlegm only |                    |                                     |
|---------------------------------|---------------------|-------------------|-------------------------------------|---------------------|--------------------|-------------------------------------|---------------------|--------------------|-------------------------------------|
|                                 | Unexposed           | Exposed           | RR (95%CI)                          | Unexposed           | Exposed            | RR (95%CI)                          | Unexposed           | Exposed            | RR (95%CI)                          |
| Biological dust                 | 109/8518<br>(1.3%)  | 41/3266<br>(1.3%) | 1.03<br>(0.78 – 1.36)               | 358/8518<br>(4.2%)  | 130/3266<br>(4.0%) | 0.95<br>(0.81 – 1.12)               | 286/8518<br>(3.4%)  | 130/3266<br>(4.0%) | 1.15<br>(0.97 – 1.37)               |
| Mineral Dust                    | 105/9267<br>(1.1%)  | 45/2517<br>(1.8%) | 1.35<br>(0.99 – 1.84)               | 362/9267<br>(3.9%)  | 126/2517<br>(5.0%) | 1.11<br>(0.92 – 1.33)               | 271/9267<br>(2.9%)  | 145/2517<br>(5.8%) | <b>1.72</b><br><b>(1.43 – 2.06)</b> |
| Gases & fumes                   | 84/7302<br>(1.2%)   | 66/4482<br>(1.5%) | 1.12<br>(0.86 – 1.46)               | 295/7302<br>(4.0%)  | 193/4482<br>(4.3%) | 0.96<br>(0.82 – 1.12)               | 215/7302<br>(2.9%)  | 201/4482<br>(4.5%) | <b>1.32</b><br><b>(1.12 – 1.55)</b> |
| Vapors, Gases,<br>Dusts & Fumes | 80/6722<br>(1.2%)   | 70/5062<br>(1.4%) | 1.07<br>(0.82 – 1.39)               | 274/6722<br>(4.1%)  | 214/5062<br>(4.2%) | 0.96<br>(0.82 – 1.12)               | 192/6722<br>(2.9%)  | 224/5062<br>(4.4%) | <b>1.34</b><br><b>(1.14 – 1.58)</b> |
| Herbicides                      | 148/11597<br>(1.3%) | 2/187<br>(1.1%)   | 1.05<br>(0.38 – 2.90)               | 479/11597<br>(4.1%) | 9/187<br>(4.8%)    | 1.19<br>(0.70 – 2.05)               | 405/11597<br>(3.5%) | 11/187<br>(5.9%)   | 1.29<br>(0.76 – 2.20)               |
| Insecticides                    | 148/11483<br>(1.3%) | 2/301<br>(0.7%)   | 0.80<br>(0.33 – 1.97)               | 475/11483<br>(4.1%) | 13/301<br>(4.3%)   | 1.02<br>(0.64 – 1.61)               | 402/11483<br>(3.5%) | 14/301<br>(4.7%)   | 1.11<br>(0.70 – 1.76)               |
| Fungicides                      | 147/11465<br>(1.3%) | 3/319<br>(0.9%)   | 0.79<br>(0.32 – 1.96)               | 474/11465<br>(4.1%) | 14/319<br>(4.4%)   | 1.03<br>(0.66 – 1.62)               | 400/11465<br>(3.5%) | 16/319<br>(5.0%)   | 1.19<br>(0.77 – 1.84)               |
| All pesticides                  | 146/11363<br>(1.3%) | 4/421<br>(1.0%)   | 0.83<br>(0.39 – 1.79)               | 470/11363<br>(4.1%) | 18/421<br>(4.3%)   | 0.99<br>(0.66 – 1.47)               | 398/11363<br>(3.5%) | 18/421<br>(4.3%)   | 1.02<br>(0.67 – 1.54)               |
| Aromatic<br>solvents            | 124/10210<br>(1.2%) | 26/1574<br>(1.7%) | 1.08<br>(0.74 – 1.58)               | 413/10210<br>(4.0%) | 75/1574<br>(4.8%)  | 1.11<br>(0.89 – 1.38)               | 341/10210<br>(3.3%) | 75/1574<br>(4.8%)  | <b>1.26</b><br><b>(1.01 – 1.56)</b> |
| Chlorinated<br>solvents         | 128/10520<br>(1.2%) | 22/1264<br>(1.7%) | 1.23<br>(0.84 – 1.82)               | 425/10520<br>(4.0%) | 63/1264<br>(5.0%)  | 1.16<br>(0.92 – 1.46)               | 355/10520<br>(3.4%) | 61/1264<br>(4.8%)  | <b>1.32</b><br><b>(1.04 – 1.66)</b> |
| Other solvents                  | 115/8932<br>(1.3%)  | 35/2852<br>(1.2%) | 0.95<br>(0.70 – 1.29)               | 381/8932<br>(4.3%)  | 107/2852<br>(3.8%) | 0.92<br>(0.77 – 1.10)               | 308/8932<br>(3.4%)  | 108/2852<br>(3.8%) | 1.09<br>(0.91 – 1.31)               |
| Metals                          | 123/10608<br>(1.2%) | 27/1176<br>(2.3%) | <b>1.68</b><br><b>(1.15 – 2.47)</b> | 426/10608<br>(4.0%) | 62/1176<br>(5.3%)  | <b>1.28</b><br><b>(1.01 – 1.63)</b> | 352/10608<br>(3.3%) | 64/1176<br>(5.4%)  | <b>1.43</b><br><b>(1.13 – 1.80)</b> |

Pooled results from analysis on 50 multiply imputed datasets. Adjusted for age, sex, lifetime smoking pack-years, current smoking, socioeconomic status (SES), current asthma and severity of airflow limitation.

(c) Sensitivity analysis 3: incident asthma cases excluded, and no adjustment for degree of airway obstruction

|                                 | Chronic Bronchitis  |                   |                                     | Chronic cough only  |                    |                                     | Chronic phlegm only |                    |                                     |
|---------------------------------|---------------------|-------------------|-------------------------------------|---------------------|--------------------|-------------------------------------|---------------------|--------------------|-------------------------------------|
|                                 | Unexposed           | Exposed           | RR (95%CI)                          | Unexposed           | Exposed            | RR (95%CI)                          | Unexposed           | Exposed            | RR (95%CI)                          |
| Biological dust                 | 109/8518<br>(1.3%)  | 41/3266<br>(1.3%) | 1.05<br>(0.80 – 1.39)               | 358/8518<br>(4.2%)  | 130/3266<br>(4.0%) | 0.97<br>(0.82 – 1.14)               | 286/8518<br>(3.4%)  | 130/3266<br>(4.0%) | 1.17<br>(0.98 – 1.39)               |
| Mineral Dust                    | 105/9267<br>(1.1%)  | 45/2517<br>(1.8%) | <b>1.37</b><br><b>(1.01 – 1.86)</b> | 362/9267<br>(3.9%)  | 126/2517<br>(5.0%) | 1.12<br>(0.93 – 1.35)               | 271/9267<br>(2.9%)  | 145/2517<br>(5.8%) | <b>1.73</b><br><b>(1.44 – 2.08)</b> |
| Gases & fumes                   | 84/7302<br>(1.2%)   | 66/4482<br>(1.5%) | 1.14<br>(0.88 – 1.49)               | 295/7302<br>(4.0%)  | 193/4482<br>(4.3%) | 0.97<br>(0.83 – 1.14)               | 215/7302<br>(2.9%)  | 201/4482<br>(4.5%) | <b>1.34</b><br><b>(1.13 – 1.57)</b> |
| Vapors, Gases,<br>Dusts & Fumes | 80/6722<br>(1.2%)   | 70/5062<br>(1.4%) | 1.09<br>(0.84 – 1.41)               | 274/6722<br>(4.1%)  | 214/5062<br>(4.2%) | 0.97<br>(0.83 – 1.13)               | 192/6722<br>(2.9%)  | 224/5062<br>(4.4%) | <b>1.36</b><br><b>(1.15 – 1.59)</b> |
| Herbicides                      | 148/11597<br>(1.3%) | 2/187<br>(1.1%)   | 1.11<br>(0.40 – 3.02)               | 479/11597<br>(4.1%) | 9/187<br>(4.8%)    | 1.22<br>(0.71 – 2.09)               | 405/11597<br>(3.5%) | 11/187<br>(5.9%)   | 1.34<br>(0.79 – 2.28)               |
| Insecticides                    | 148/11483<br>(1.3%) | 2/301<br>(0.7%)   | 0.83<br>(0.34 – 2.02)               | 475/11483<br>(4.1%) | 13/301<br>(4.3%)   | 1.03<br>(0.65 – 1.64)               | 402/11483<br>(3.5%) | 14/301<br>(4.7%)   | 1.14<br>(0.72 – 1.80)               |
| Fungicides                      | 147/11465<br>(1.3%) | 3/319<br>(0.9%)   | 0.81<br>(0.33 – 1.98)               | 474/11465<br>(4.1%) | 14/319<br>(4.4%)   | 1.04<br>(0.66 – 1.62)               | 400/11465<br>(3.5%) | 16/319<br>(5.0%)   | 1.21<br>(0.78 – 1.87)               |
| All pesticides                  | 146/11363<br>(1.3%) | 4/421<br>(1.0%)   | 0.85<br>(0.40 – 1.82)               | 470/11363<br>(4.1%) | 18/421<br>(4.3%)   | 1.00<br>(0.67 – 1.49)               | 398/11363<br>(3.5%) | 18/421<br>(4.3%)   | 1.04<br>(0.69 – 1.57)               |
| Aromatic<br>solvents            | 124/10210<br>(1.2%) | 26/1574<br>(1.7%) | 1.10<br>(0.75 – 1.60)               | 413/10210<br>(4.0%) | 75/1574<br>(4.8%)  | 1.12<br>(0.90 – 1.39)               | 341/10210<br>(3.3%) | 75/1574<br>(4.8%)  | <b>1.27</b><br><b>(1.02 – 1.57)</b> |
| Chlorinated<br>solvents         | 128/10520<br>(1.2%) | 22/1264<br>(1.7%) | 1.26<br>(0.85 – 1.86)               | 425/10520<br>(4.0%) | 63/1264<br>(5.0%)  | 1.17<br>(0.93 – 1.48)               | 355/10520<br>(3.4%) | 61/1264<br>(4.8%)  | <b>1.33</b><br><b>(1.05 – 1.67)</b> |
| Other solvents                  | 115/8932<br>(1.3%)  | 35/2852<br>(1.2%) | 0.95<br>(0.70 – 1.29)               | 381/8932<br>(4.3%)  | 107/2852<br>(3.8%) | 0.92<br>(0.77 – 1.10)               | 308/8932<br>(3.4%)  | 108/2852<br>(3.8%) | 1.09<br>(0.91 – 1.31)               |
| Metals                          | 123/10608<br>(1.2%) | 27/1176<br>(2.3%) | <b>1.70</b><br><b>(1.15 – 2.49)</b> | 426/10608<br>(4.0%) | 62/1176<br>(5.3%)  | <b>1.29</b><br><b>(1.02 – 1.64)</b> | 352/10608<br>(3.3%) | 64/1176<br>(5.4%)  | <b>1.43</b><br><b>(1.13 – 1.81)</b> |

Pooled results from analysis on 50 multiply imputed datasets. Adjusted for age, sex, lifetime smoking pack-years, current smoking, socioeconomic status (SES), current asthma and severity of airflow limitation.

(d) Sensitivity analysis 4: no adjustment for socioeconomic status (SES)

|                                 | Chronic Bronchitis  |                    |                                     | Chronic cough only  |                    |                                     | Chronic phlegm only |                    |                                     |
|---------------------------------|---------------------|--------------------|-------------------------------------|---------------------|--------------------|-------------------------------------|---------------------|--------------------|-------------------------------------|
|                                 | Unexposed           | Exposed            | RR (95%CI)                          | Unexposed           | Exposed            | RR (95%CI)                          | Unexposed           | Exposed            | RR (95%CI)                          |
| Biological dust                 | 159/9496<br>(1.7%)  | 68/3689<br>(1.8%)  | 0.99<br>(0.75 – 1.32)               | 480/9496<br>(5.1%)  | 188/3689<br>(5.1%) | 0.94<br>(0.80 – 1.10)               | 385/9496<br>(4.1%)  | 179/3689<br>(4.9%) | 1.15<br>(0.96 – 1.36)               |
| Mineral Dust                    | 164/10359<br>(1.6%) | 63/2826<br>(2.2%)  | 1.29<br>(0.95 – 1.75)               | 504/10359<br>(4.9%) | 164/2826<br>(5.8%) | 1.11<br>(0.93 – 1.33)               | 374/10359<br>(3.6%) | 190/2826<br>(6.7%) | <b>1.69</b><br><b>(1.41 – 2.01)</b> |
| Gases & fumes                   | 131/8164<br>(1.6%)  | 96/5021<br>(1.9%)  | 1.11<br>(0.85 – 1.45)               | 409/8164<br>(5.0%)  | 259/5021<br>(5.2%) | 0.98<br>(0.84 – 1.14)               | 299/8164<br>(3.7%)  | 265/5021<br>(5.3%) | <b>1.33</b><br><b>(1.13 – 1.56)</b> |
| Vapors, Gases,<br>Dusts & Fumes | 123/7525<br>(1.6%)  | 104/5660<br>(1.8%) | 1.07<br>(0.82 – 1.38)               | 379/7525<br>(5.0%)  | 289/5660<br>(5.1%) | 0.97<br>(0.84 – 1.13)               | 270/7525<br>(3.6%)  | 294/5660<br>(5.2%) | <b>1.36</b><br><b>(1.16 – 1.60)</b> |
| Herbicides                      | 223/12974<br>(1.7%) | 4/211<br>(1.9%)    | 1.06<br>(0.39 – 2.89)               | 655/12974<br>(5.0%) | 13/211<br>(6.2%)   | 1.21<br>(0.71 – 2.05)               | 551/12974<br>(4.2%) | 13/211<br>(6.2%)   | 1.31<br>(0.76 – 2.26)               |
| Insecticides                    | 222/12852<br>(1.7%) | 5/333<br>(1.5%)    | 0.82<br>(0.34 – 1.99)               | 650/12852<br>(5.1%) | 18/333<br>(5.4%)   | 1.04<br>(0.66 – 1.64)               | 546/12852<br>(4.2%) | 18/333<br>(5.4%)   | 1.14<br>(0.72 – 1.81)               |
| Fungicides                      | 222/12823<br>(1.7%) | 5/362<br>(1.4%)    | 0.77<br>(0.31 – 1.88)               | 649/12823<br>(5.1%) | 19/362<br>(5.2%)   | 1.03<br>(0.66 – 1.61)               | 544/12823<br>(4.2%) | 20/362<br>(5.5%)   | 1.19<br>(0.77 – 1.83)               |
| All pesticides                  | 220/12716<br>(1.7%) | 7/469<br>(1.5%)    | 0.84<br>(0.39 – 1.78)               | 644/12716<br>(5.1%) | 24/469<br>(5.1%)   | 1.01<br>(0.68 – 1.50)               | 541/12716<br>(4.3%) | 23/469<br>(4.9%)   | 1.04<br>(0.69 – 1.57)               |
| Aromatic<br>solvents            | 195/11419<br>(1.7%) | 32/1766<br>(1.8%)  | 1.05<br>(0.71 – 1.55)               | 571/11419<br>(5.0%) | 97/1766<br>(5.5%)  | 1.10<br>(0.89 – 1.37)               | 467/11419<br>(4.1%) | 97/1766<br>(5.5%)  | <b>1.26</b><br><b>(1.01 – 1.56)</b> |
| Chlorinated<br>solvents         | 198/11769<br>(1.7%) | 29/1416<br>(2.0%)  | 1.19<br>(0.80 – 1.78)               | 586/11769<br>(5.0%) | 82/1416<br>(5.8%)  | 1.15<br>(0.91 – 1.45)               | 482/11769<br>(4.1%) | 82/1416<br>(5.8%)  | <b>1.32</b><br><b>(1.05 – 1.66)</b> |
| Other solvents                  | 175/9976<br>(1.8%)  | 52/3209<br>(1.6%)  | 0.94<br>(0.69 – 1.28)               | 518/9976<br>(5.2%)  | 150/3209<br>(4.7%) | 0.91<br>(0.76 – 1.08)               | 418/9976<br>(4.2%)  | 146/3209<br>(4.5%) | 1.09<br>(0.91 – 1.31)               |
| Metals                          | 194/11878<br>(1.6%) | 33/1307<br>(2.5%)  | <b>1.67</b><br><b>(1.14 – 2.47)</b> | 588/11878<br>(5.0%) | 80/1307<br>(6.1%)  | <b>1.30</b><br><b>(1.03 – 1.64)</b> | 483/11878<br>(4.1%) | 81/1307<br>(6.2%)  | <b>1.44</b><br><b>(1.14 – 1.81)</b> |

Pooled results from analysis on 50 multiply imputed datasets. Adjusted for age, sex, lifetime smoking pack-years, current smoking, current asthma and severity of airflow limitation.

**Supplementary Table 2: Association between occupational exposures and incidence of CB, chronic cough and chronic phlegm, stratified by intensity of exposure (only low exposure / ever high exposure, vs unexposed). N=8794 participants followed-up at ECRHS II and III (n=13185 observations)**

|                              | Chronic Bronchitis                  |                                     | Chronic cough only                  |                       | Chronic phlegm only                 |                                     |
|------------------------------|-------------------------------------|-------------------------------------|-------------------------------------|-----------------------|-------------------------------------|-------------------------------------|
|                              | Only low                            | Ever high                           | Only low                            | Ever high             | Only low                            | Ever high                           |
| Biological dust              | 1.02<br>(0.77 – 1.37)               | 0.86<br>(0.42 – 1.75)               | 0.98<br>(0.82 – 1.15)               | 0.85<br>(0.57 – 1.27) | 1.18<br>(0.99 – 1.41)               | 0.94<br>(0.62 – 1.42)               |
| Mineral Dust                 | 1.36<br>(0.99 – 1.88)               | 1.39<br>(0.88 – 2.20)               | 1.11<br>(0.91 – 1.34)               | 1.08<br>(0.81 – 1.45) | <b>1.62</b><br><b>(1.33 – 1.96)</b> | <b>1.45</b><br><b>(1.12 – 1.89)</b> |
| Gases & fumes                | 1.22<br>(0.94 – 1.58)               | 0.91<br>(0.55 – 1.51)               | 1.01<br>(0.86 – 1.18)               | 0.92<br>(0.69 – 1.22) | <b>1.23</b><br><b>(1.04 – 1.45)</b> | <b>1.43</b><br><b>(1.11 – 1.84)</b> |
| Vapors, Gases, Dusts & Fumes | 1.10<br>(0.84 – 1.44)               | 1.17<br>(0.80 – 1.71)               | 0.96<br>(0.82 – 1.12)               | 1.02<br>(0.82 – 1.28) | <b>1.20</b><br><b>(1.02 – 1.41)</b> | <b>1.55</b><br><b>(1.25 – 1.91)</b> |
| Herbicides                   | 1.63<br>(0.60 – 4.40)               | N/A                                 | 1.56<br>(0.91 – 2.68)               | 0.84<br>(0.28 – 2.52) | 1.30<br>(0.67 – 2.51)               | 1.19<br>(0.46 – 3.05)               |
| Insecticides                 | 1.29<br>(0.48 – 3.45)               | 0.67<br>(0.17 – 2.68)               | 0.98<br>(0.52 – 1.87)               | 1.15<br>(0.63 – 2.09) | 0.96<br>(0.49 – 1.89)               | 1.40<br>(0.78 – 2.50)               |
| Fungicides                   | 0.86<br>(0.27 – 2.74)               | 0.67<br>(0.17 – 2.70)               | 0.97<br>(0.52 – 1.80)               | 1.13<br>(0.62 – 2.06) | 1.08<br>(0.58 – 1.99)               | 1.23<br>(0.67 – 2.26)               |
| All pesticides               | 1.23<br>(0.55 – 2.76)               | 0.90<br>(0.29 – 2.79)               | 1.16<br>(0.73 – 1.87)               | 1.10<br>(0.62 – 1.95) | 0.95<br>(0.56 – 1.63)               | 1.34<br>(0.76 – 2.33)               |
| Aromatic solvents            | 1.10<br>(0.75 – 1.62)               | 0.77<br>(0.19 – 3.02)               | 1.11<br>(0.89 – 1.38)               | 1.13<br>(0.61 – 2.11) | 1.20<br>(0.96 – 1.50)               | 1.53<br>(0.88 – 2.67)               |
| Chlorinated solvents         | 1.12<br>(0.70 – 1.77)               | <b>2.00</b><br><b>(1.12 – 3.60)</b> | 1.19<br>(0.93 – 1.53)               | 1.10<br>(0.72 – 1.70) | 1.26<br>(0.97 – 1.64)               | <b>1.55</b><br><b>(1.08 – 2.24)</b> |
| Other solvents               | 0.98<br>(0.72 – 1.34)               | 0.73<br>(0.24 – 2.25)               | 0.92<br>(0.77 – 1.10)               | 1.04<br>(0.61 – 1.77) | 1.08<br>(0.89 – 1.30)               | 1.54<br>(0.96 – 2.45)               |
| Metals                       | <b>1.77</b><br><b>(1.16 – 2.72)</b> | 1.58<br>(0.88 – 2.83)               | <b>1.42</b><br><b>(1.10 – 1.84)</b> | 0.96<br>(0.63 – 1.46) | <b>1.41</b><br><b>(1.08 – 1.84)</b> | <b>1.49</b><br><b>(1.06 – 2.11)</b> |

Pooled results from analysis on 50 multiply imputed datasets. Adjusted for age, sex, lifetime smoking pack-years, current smoking, socioeconomic status (SES), current asthma and severity of airflow limitation.

**Supplementary Table 3: Association between occupational exposures and incidence of CB, chronic cough and chronic phlegm, stratified by sex and smoking status. N=8794 participants followed-up at ECRHS II and III (n=13185 observations)**

(a) Stratified by sex

|                              | Chronic Bronchitis                  |                       | Chronic cough only    |                       | Chronic phlegm only                 |                                     |
|------------------------------|-------------------------------------|-----------------------|-----------------------|-----------------------|-------------------------------------|-------------------------------------|
|                              | Male                                | Female                | Male                  | Female                | Male                                | Female                              |
| Biological dust              | 0.97<br>(0.62 – 1.51)               | 1.03<br>(0.72 – 1.48) | 0.97<br>(0.75 – 1.24) | 0.91<br>(0.74 – 1.13) | 1.09<br>(0.85 – 1.41)               | 1.18<br>(0.93 – 1.50)               |
| Mineral Dust                 | 1.24<br>(0.82 – 1.86)               | 1.50<br>(0.97 – 2.33) | 1.06<br>(0.84 – 1.34) | 1.18<br>(0.90 – 1.55) | <b>1.76</b><br><b>(1.40 – 2.22)</b> | <b>1.64</b><br><b>(1.23 – 2.19)</b> |
| Gases & fumes                | 1.21<br>(0.82 – 1.80)               | 1.08<br>(0.75 – 1.54) | 1.02<br>(0.82 – 1.28) | 0.92<br>(0.74 – 1.14) | <b>1.51</b><br><b>(1.20 – 1.91)</b> | 1.17<br>(0.92 – 1.48)               |
| Vapors, Gases, Dusts & Fumes | 1.17<br>(0.79 – 1.74)               | 1.02<br>(0.72 – 1.45) | 1.03<br>(0.82 – 1.29) | 0.92<br>(0.75 – 1.13) | <b>1.63</b><br><b>(1.29 – 2.06)</b> | 1.14<br>(0.91 – 1.44)               |
| Herbicides                   | 0.77<br>(0.19 – 3.20)               | 1.76<br>(0.44 – 7.03) | 1.36<br>(0.74 – 2.50) | 0.88<br>(0.29 – 2.63) | 1.08<br>(0.55 – 2.14)               | 1.90<br>(0.79 – 4.55)               |
| Insecticides                 | 0.74<br>(0.24 – 2.31)               | 1.01<br>(0.25 – 4.12) | 1.01<br>(0.58 – 1.76) | 1.08<br>(0.49 – 2.39) | 0.77<br>(0.41 – 1.46)               | <b>2.10</b><br><b>(1.10 – 4.01)</b> |
| Fungicides                   | 0.65<br>(0.20 – 2.07)               | 1.10<br>(0.27 – 4.50) | 1.04<br>(0.62 – 1.76) | 0.97<br>(0.41 – 2.31) | 0.91<br>(0.52 – 1.59)               | <b>2.03</b><br><b>(1.03 – 4.02)</b> |
| All pesticides               | 0.83<br>(0.34 – 2.04)               | 0.90<br>(0.22 – 3.68) | 1.02<br>(0.65 – 1.62) | 0.94<br>(0.43 – 2.09) | 0.80<br>(0.47 – 1.34)               | 1.84<br>(0.96 – 3.51)               |
| Aromatic solvents            | 1.12<br>(0.70 – 1.77)               | 0.93<br>(0.43 – 1.98) | 1.14<br>(0.88 – 1.47) | 0.99<br>(0.64 – 1.51) | <b>1.35</b><br><b>(1.05 – 1.73)</b> | 0.99<br>(0.60 – 1.62)               |
| Chlorinated solvents         | 1.41<br>(0.88 – 2.25)               | 0.79<br>(0.33 – 1.90) | 1.16<br>(0.88 – 1.53) | 1.10<br>(0.71 – 1.70) | <b>1.36</b><br><b>(1.04 – 1.78)</b> | 1.17<br>(0.72 – 1.89)               |
| Other solvents               | 1.09<br>(0.70 – 1.69)               | 0.82<br>(0.53 – 1.27) | 0.96<br>(0.75 – 1.24) | 0.86<br>(0.67 – 1.11) | <b>1.27</b><br><b>(1.00 – 1.62)</b> | 0.90<br>(0.67 – 1.19)               |
| Metals                       | <b>1.74</b><br><b>(1.13 – 2.67)</b> | 1.53<br>(0.57 – 4.12) | 1.26<br>(0.97 – 1.64) | 1.44<br>(0.82 – 2.54) | <b>1.52</b><br><b>(1.18 – 1.96)</b> | 0.86<br>(0.37 – 2.02)               |

Pooled results from analysis on 50 multiply imputed datasets. Adjusted for age, sex, lifetime smoking pack-years, current smoking, socioeconomic status (SES), current asthma and severity of airflow limitation.

## (b) Stratified by smoking status (ever smokers / never smokers)

|                              | Chronic Bronchitis                  |                       | Chronic cough only    |                       | Chronic phlegm only                 |                                     |
|------------------------------|-------------------------------------|-----------------------|-----------------------|-----------------------|-------------------------------------|-------------------------------------|
|                              | Never smokers                       | Ever smokers          | Never smokers         | Ever smokers          | Never smokers                       | Ever smokers                        |
| Biological dust              | 1.23<br>(0.74 – 2.06)               | 0.96<br>(0.69 – 1.33) | 1.04<br>(0.78 – 1.39) | 0.91<br>(0.75 – 1.10) | 1.27<br>(0.95 – 1.71)               | 1.10<br>(0.90 – 1.35)               |
| Mineral Dust                 | <b>1.77</b><br><b>(1.00 – 3.10)</b> | 1.26<br>(0.89 – 1.76) | 1.21<br>(0.87 – 1.69) | 1.08<br>(0.88 – 1.33) | <b>1.82</b><br><b>(1.32 – 2.50)</b> | <b>1.69</b><br><b>(1.37 – 2.07)</b> |
| Gases & fumes                | 1.38<br>(0.86 – 2.22)               | 1.09<br>(0.81 – 1.46) | 1.09<br>(0.84 – 1.42) | 0.93<br>(0.78 – 1.11) | <b>1.40</b><br><b>(1.06 – 1.85)</b> | <b>1.32</b><br><b>(1.10 – 1.59)</b> |
| Vapors, Gases, Dusts & Fumes | 1.30<br>(0.82 – 2.07)               | 1.04<br>(0.78 – 1.39) | 1.13<br>(0.88 – 1.45) | 0.91<br>(0.77 – 1.09) | <b>1.50</b><br><b>(1.15 – 1.95)</b> | <b>1.32</b><br><b>(1.10 – 1.58)</b> |
| Herbicides                   | 2.81<br>(0.81 – 9.77)               | 0.46<br>(0.07 – 3.19) | 1.81<br>(0.81 – 4.01) | 0.94<br>(0.44 – 2.01) | 1.92<br>(0.84 – 4.37)               | 1.08<br>(0.52 – 2.22)               |
| Insecticides                 | 2.03<br>(0.58 – 7.15)               | 0.48<br>(0.12 – 1.89) | 1.29<br>(0.57 – 2.91) | 0.94<br>(0.53 – 1.67) | 1.45<br>(0.63 – 3.31)               | 1.04<br>(0.59 – 1.83)               |
| Fungicides                   | 1.85<br>(0.52 – 6.58)               | 0.46<br>(0.12 – 1.81) | 1.36<br>(0.64 – 2.86) | 0.89<br>(0.50 – 1.58) | 1.23<br>(0.53 – 2.84)               | 1.18<br>(0.70 – 1.97)               |
| All pesticides               | 1.54<br>(0.43 – 5.50)               | 0.67<br>(0.25 – 1.78) | 1.13<br>(0.53 – 2.40) | 0.96<br>(0.59 – 1.55) | 1.07<br>(0.46 – 2.48)               | 1.04<br>(0.65 – 1.68)               |
| Aromatic solvents            | 1.30<br>(0.62 – 2.73)               | 1.04<br>(0.67 – 1.59) | 1.31<br>(0.89 – 1.92) | 1.04<br>(0.81 – 1.34) | 1.11<br>(0.72 – 1.72)               | <b>1.33</b><br><b>(1.04 – 1.69)</b> |
| Chlorinated solvents         | 1.58<br>(0.74 – 3.41)               | 1.16<br>(0.75 – 1.82) | 1.30<br>(0.84 – 2.01) | 1.12<br>(0.86 – 1.46) | 1.10<br>(0.67 – 1.80)               | <b>1.41</b><br><b>(1.09 – 1.81)</b> |
| Other solvents               | 1.09<br>(0.62 – 1.91)               | 0.91<br>(0.63 – 1.29) | 1.04<br>(0.77 – 1.41) | 0.87<br>(0.70 – 1.07) | 1.23<br>(0.90 – 1.68)               | 1.04<br>(0.84 – 1.28)               |
| Metals                       | <b>2.45</b><br><b>(1.23 – 4.91)</b> | 1.51<br>(0.97 – 2.36) | 1.43<br>(0.91 – 2.22) | 1.24<br>(0.95 – 1.64) | 1.32<br>(0.82 – 2.12)               | <b>1.48</b><br><b>(1.14 – 1.93)</b> |

Pooled results from analysis on 50 multiply imputed datasets. Adjusted for age, sex, lifetime smoking pack-years, current smoking, socioeconomic status (SES), current asthma and severity of airflow limitation.

**Supplementary Table 4: Association between occupational exposures and incidence of CB, chronic cough and chronic phlegm: complete case analysis.**

**N=6186 participants followed-up at ECRHS II and III (n=9046 observations)**

|                                 | Chronic Bronchitis  |                    |                                     | Chronic cough only  |                    |                       | Chronic phlegm only |                    |                                     |
|---------------------------------|---------------------|--------------------|-------------------------------------|---------------------|--------------------|-----------------------|---------------------|--------------------|-------------------------------------|
|                                 | Unexposed           | Exposed            | RR (95%CI)                          | Unexposed           | Exposed            | RR (95%CI)            | Unexposed           | Exposed            | RR (95%CI)                          |
| Biological dust                 | 159/9496<br>(1.7%)  | 68/3689<br>(1.8%)  | 1.01<br>(0.73 – 1.39)               | 480/9496<br>(5.1%)  | 188/3689<br>(5.1%) | 0.95<br>(0.79 – 1.15) | 385/9496<br>(4.1%)  | 179/3689<br>(4.9%) | 1.16<br>(0.95 – 1.42)               |
| Mineral Dust                    | 164/10359<br>(1.6%) | 63/2826<br>(2.2%)  | <b>1.49</b><br><b>(1.04 – 2.13)</b> | 504/10359<br>(4.9%) | 164/2826<br>(5.8%) | 1.13<br>(0.91 – 1.40) | 374/10359<br>(3.6%) | 190/2826<br>(6.7%) | <b>1.90</b><br><b>(1.54 – 2.35)</b> |
| Gases & fumes                   | 131/8164<br>(1.6%)  | 96/5021<br>(1.9%)  | 1.17<br>(0.86 – 1.59)               | 409/8164<br>(5.0%)  | 259/5021<br>(5.2%) | 1.00<br>(0.83 – 1.20) | 299/8164<br>(3.7%)  | 265/5021<br>(5.3%) | <b>1.39</b><br><b>(1.14 – 1.68)</b> |
| Vapors, Gases,<br>Dusts & Fumes | 123/7525<br>(1.6%)  | 104/5660<br>(1.8%) | 1.05<br>(0.78 – 1.43)               | 379/7525<br>(5.0%)  | 289/5660<br>(5.1%) | 0.99<br>(0.82 – 1.18) | 270/7525<br>(3.6%)  | 294/5660<br>(5.2%) | <b>1.36</b><br><b>(1.12 – 1.64)</b> |
| Herbicides                      | 223/12974<br>(1.7%) | 4/211<br>(1.9%)    | 1.26<br>(0.39 – 4.05)               | 655/12974<br>(5.0%) | 13/211<br>(6.2%)   | 1.44<br>(0.79 – 2.61) | 551/12974<br>(4.2%) | 13/211<br>(6.2%)   | 1.66<br>(0.93 – 2.96)               |
| Insecticides                    | 222/12852<br>(1.7%) | 5/333<br>(1.5%)    | 0.98<br>(0.37 – 2.61)               | 650/12852<br>(5.1%) | 18/333<br>(5.4%)   | 1.18<br>(0.71 – 1.97) | 546/12852<br>(4.2%) | 18/333<br>(5.4%)   | 1.27<br>(0.76 – 2.12)               |
| Fungicides                      | 222/12823<br>(1.7%) | 5/362<br>(1.4%)    | 0.88<br>(0.32 – 2.40)               | 649/12823<br>(5.1%) | 19/362<br>(5.2%)   | 1.23<br>(0.75 – 1.99) | 544/12823<br>(4.2%) | 20/362<br>(5.5%)   | 1.29<br>(0.79 – 2.11)               |
| All pesticides                  | 220/12716<br>(1.7%) | 7/469<br>(1.5%)    | 1.03<br>(0.46 – 2.34)               | 644/12716<br>(5.1%) | 24/469<br>(5.1%)   | 1.13<br>(0.73 – 1.77) | 541/12716<br>(4.3%) | 23/469<br>(4.9%)   | 1.12<br>(0.70 – 1.78)               |
| Aromatic<br>solvents            | 195/11419<br>(1.7%) | 32/1766<br>(1.8%)  | 1.10<br>(0.70 – 1.73)               | 571/11419<br>(5.0%) | 97/1766<br>(5.5%)  | 1.06<br>(0.81 – 1.38) | 467/11419<br>(4.1%) | 97/1766<br>(5.5%)  | <b>1.44</b><br><b>(1.13 – 1.85)</b> |
| Chlorinated<br>solvents         | 198/11769<br>(1.7%) | 29/1416<br>(2.0%)  | 1.23<br>(0.77 – 1.97)               | 586/11769<br>(5.0%) | 82/1416<br>(5.8%)  | 1.02<br>(0.76 – 1.35) | 482/11769<br>(4.1%) | 82/1416<br>(5.8%)  | <b>1.39</b><br><b>(1.07 – 1.81)</b> |
| Other solvents                  | 175/9976<br>(1.8%)  | 52/3209<br>(1.6%)  | 0.88<br>(0.61 – 1.26)               | 518/9976<br>(5.2%)  | 150/3209<br>(4.7%) | 0.83<br>(0.67 – 1.03) | 418/9976<br>(4.2%)  | 146/3209<br>(4.5%) | 1.12<br>(0.91 – 1.39)               |
| Metals                          | 194/11878<br>(1.6%) | 33/1307<br>(2.5%)  | 1.54<br>(0.97 – 2.46)               | 588/11878<br>(5.0%) | 80/1307<br>(6.1%)  | 1.18<br>(0.89 – 1.56) | 483/11878<br>(4.1%) | 81/1307<br>(6.2%)  | <b>1.41</b><br><b>(1.08 – 1.85)</b> |

Adjusted for age, sex, lifetime smoking pack-years, current smoking, socioeconomic status (SES), current asthma and severity of airflow limitation.



**Supplementary Table 5: Descriptive characteristics of the participants excluded because of cough of phlegm at baseline (ECRHS I), N=1,033**

|                                                             | ECRHS II           | ECRHS III          |
|-------------------------------------------------------------|--------------------|--------------------|
| Number of participants followed up                          | 919                | 575                |
| Median age at follow-up (y), range                          | 42.5 (27.9 – 56.9) | 53.2 (38.6 – 67.1) |
| % male                                                      | 51.4               | 49.6               |
| % with chronic bronchitis (cough with phlegm)               | 14.0               | 14.4               |
| % with chronic cough                                        | 27.2               | 28.0               |
| % with chronic phlegm                                       | 25.4               | 21.7               |
| % with current asthma                                       | 19.4               | 21.9               |
| % current smokers                                           | 45.6               | 31.0               |
| % ever smokers                                              | 69.5               | 68.1               |
| Median lifetime smoking pack-years (ever smokers only)      | 20.2               | 25.3               |
| % with airflow limitation (FEV1/FVC < LLN)                  | 10.0               | 17.2               |
| Severity (among those with airflow limitation)              |                    |                    |
| FEV1 >= 80% predicted                                       | 44.0               | 40.0               |
| 50% <= FEV1 < 80% predicted                                 | 52.0               | 50.6               |
| FEV1 < 50% predicted                                        | 4.0                | 9.4                |
| Occupational exposures (% with any exposure since baseline) |                    |                    |
| Biological dust                                             | 27.7               | 33.2               |
| Mineral Dust                                                | 26.9               | 30.4               |
| Gases & fumes                                               | 43.4               | 46.6               |
| Vapors, Gases, Dusts & Fumes                                | 46.6               | 50.3               |
| Herbicides                                                  | 1.6                | 1.9                |
| Insecticides                                                | 2.3                | 3.1                |
| Fungicides                                                  | 2.4                | 4.3                |
| All pesticides                                              | 3.0                | 5.4                |
| Aromatic solvents                                           | 16.0               | 17.4               |
| Chlorinated solvents                                        | 12.9               | 13.6               |
| Other solvents                                              | 23.7               | 25.9               |
| Metals                                                      | 12.2               | 15.5               |
| % missing information                                       |                    |                    |
| Lifetime smoking pack-years                                 | 9.7                | 32.2               |
| Current smoking                                             | 1.4                | 18.6               |
| Current asthma                                              | 1.6                | 1.6                |
| Socioeconomic status                                        | 0.3                | 3.8                |
| Lung function                                               | 18.5               | 14.3               |

**Supplementary Table 6: Crude effects of occupational exposures on chronic bronchitis symptoms at each study follow-up (ECRHS II and ECRHS III), N=7,819 at ECRHS II and N=5,366 at ECRHS III**

|                                 | ECRHS II           |                   |                       | ECRHS III          |                   |                       |
|---------------------------------|--------------------|-------------------|-----------------------|--------------------|-------------------|-----------------------|
|                                 | Unexposed          | Exposed           | Crude RR<br>(95%CI)   | Unexposed          | Exposed           | Crude RR<br>(95%CI)   |
| Biological dust                 | 88/5767<br>(1.5%)  | 28/2052<br>(1.4%) | 0.89<br>(0.59 - 1.36) | 71/3729<br>(1.9%)  | 40/1637<br>(2.4%) | 1.28<br>(0.87 - 1.88) |
| Mineral Dust                    | 87/6231<br>(1.4%)  | 29/1588<br>(1.8%) | 1.31<br>(0.86 - 1.98) | 77/4128<br>(1.9%)  | 34/1238<br>(2.7%) | 1.47<br>(0.99 - 2.19) |
| Gases & fumes                   | 71/4970<br>(1.4%)  | 45/2849<br>(1.6%) | 1.11<br>(0.76 - 1.6)  | 60/3194<br>(1.9%)  | 51/2172<br>(2.3%) | 1.25<br>(0.86 - 1.81) |
| Vapors, Gases,<br>Dusts & Fumes | 69/4605<br>(1.5%)  | 47/3214<br>(1.5%) | 0.98<br>(0.68 - 1.41) | 54/2920<br>(1.8%)  | 57/2446<br>(2.3%) | 1.26<br>(0.87 - 1.82) |
| Herbicides                      | 116/7704<br>(1.5%) | 0/115<br>(0.0%)   | N/A                   | 107/5270<br>(2.0%) | 4/96<br>(4.2%)    | 2.05<br>(0.77 - 5.45) |
| Insecticides                    | 114/7642<br>(1.5%) | 2/177<br>(1.1%)   | 0.76<br>(0.19 - 3.04) | 108/5210<br>(2.1%) | 3/156<br>(1.9%)   | 0.93<br>(0.3 - 2.89)  |
| Fungicides                      | 116/7632<br>(1.5%) | 0/187<br>(0.0%)   | N/A                   | 106/5191<br>(2.0%) | 5/175<br>(2.9%)   | 1.4<br>(0.58 - 3.39)  |
| All pesticides                  | 114/7572<br>(1.5%) | 2/247<br>(0.8%)   | 0.54<br>(0.13 - 2.16) | 106/5144<br>(2.1%) | 5/222<br>(2.3%)   | 1.09<br>(0.45 - 2.65) |
| Aromatic<br>solvents            | 100/6833<br>(1.5%) | 16/986<br>(1.6%)  | 1.11<br>(0.66 - 1.87) | 95/4586<br>(2.1%)  | 16/780<br>(2.1%)  | 0.99<br>(0.59 - 1.67) |
| Chlorinated<br>solvents         | 102/7039<br>(1.4%) | 14/780<br>(1.8%)  | 1.24<br>(0.71 - 2.15) | 96/4730<br>(2.0%)  | 15/636<br>(2.4%)  | 1.16<br>(0.68 - 1.99) |
| Other solvents                  | 93/6044<br>(1.5%)  | 23/1775<br>(1.3%) | 0.84<br>(0.54 - 1.33) | 82/3932<br>(2.1%)  | 29/1434<br>(2.0%) | 0.97<br>(0.64 - 1.47) |
| Metals                          | 99/7098<br>(1.4%)  | 17/721<br>(2.4%)  | 1.69<br>(1.02 - 2.81) | 95/4780<br>(2.0%)  | 16/586<br>(2.7%)  | 1.37<br>(0.81 - 2.32) |

## Details about the multiple imputation procedure

Multiple imputation was employed to handle covariate missingness only (not outcome missingness due to drop-out). The most frequent covariates affected by missingness were lung function measurements (at both surveys, i.e. ECRHS II and III), plus current smoking status and lifetime smoking pack-years (only at ECRHS III) (see Table 1 in the manuscript). Very few observations had missing values on current asthma and SES.

Multiple imputation with chained equations was performed using the R package “mice”, version 2.30. The procedure was applied on the long-format dataset (n=13324 observations from N=8933 study participants). The imputation method was set to logistic regression for binary variables (current asthma and current smoking), polynomial regression for categorical variables (SES and degree of airflow limitation), and predictive mean matching for continuous variables (lifetime smoking pack-years). All variables used in the main model were used as predictors in the imputation model, including all occupational exposures, outcomes (chronic cough and chronic phlegm separately) and a survey indicator (ECRHS II or III). The passive imputation function of the “mice” package was used to ensure that the imputed value for current smoking would be set to FALSE if the imputed lifetime pack-years were zero.

Fifty imputed datasets were created with 10 Gibbs sampler iterations each; convergence was assessed by visually examining the traceplots, and was deemed very satisfactory. The distribution of imputed values for lifetime pack-years was compared to the observed values using a density plot, and was found to be very similar (see figure below).

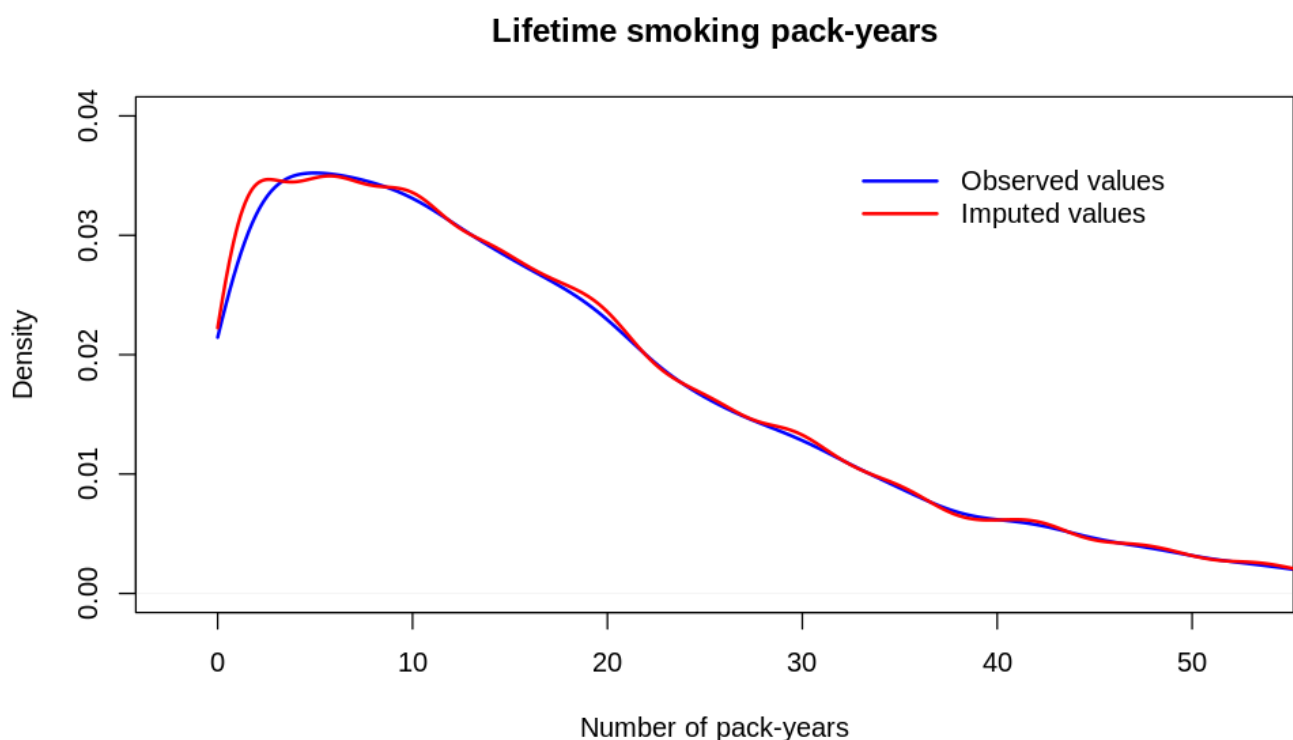

Supplement: inline-supplementary-material-1 [file inline-supplementary-material-1.pdf]
